# Supplementary material for: FADS Polymorphism, Omega-3 Fatty Acids and Diabetes Risk: A Systematic Review
Source: Nutrients. 2018 Jun 13;10(6):758. doi: 10.3390/nu10060758 (PMC6024808; doi:10.3390/nu10060758)
Supplement: Supplementary file 1 [file nutrients-10-00758-s001.pdf]

**Table 1.** Quality assessment

**Article 1: Kim et al, 2011**

| <b>DOMAIN</b>                                                    | <b>DESCRIPTION</b>                                                                                                                                                                                                            | <b>REVIEWER ASSESSMENT</b> | <b>REVIEWER COMMENTS</b>                                                           |
|------------------------------------------------------------------|-------------------------------------------------------------------------------------------------------------------------------------------------------------------------------------------------------------------------------|----------------------------|------------------------------------------------------------------------------------|
| Selection bias<br><b>Random Sequence Generation</b>              | Participants were recruited from the Health Service Center or by newspaper announcement for health examinations                                                                                                               | Low risk                   |                                                                                    |
| Selection bias<br><b>Allocation Concealment</b>                  | Doesn't apply                                                                                                                                                                                                                 | -                          | Since it was a cross-sectional study, there was no need for allocation concealment |
| Reporting Bias<br><b>Selective reporting</b>                     | Study protocol is available and all of the study's pre-specified (primary and secondary) outcomes (FADS polymorphism, IR, serum phospholipids) that are of interest in the review have been reported in the pre-specified way | Low risk                   |                                                                                    |
| Other bias<br><b>Other sources of bias</b>                       | None                                                                                                                                                                                                                          | Low risk                   |                                                                                    |
| Performance bias<br><b>Blinding (participants and personnel)</b> | Participants and personnel were not blinded, however the outcome doesn't seem to be affected by it since it is an observational study                                                                                         | Low risk                   |                                                                                    |
| Detection bias<br><b>Blinding (outcome assessment)</b>           | No blinding of outcome assessment, but the review authors judge that the outcome measurement is not likely to be influenced by lack of blinding                                                                               | Low risk                   |                                                                                    |
| Attrition bias<br><b>Incomplete outcome data</b>                 | No missing outcome data                                                                                                                                                                                                       | Low risk                   |                                                                                    |

## Article 2: Kroger et al, 2011

| DOMAIN                                                           | DESCRIPTION                                                                                                                                                                                                                                                                 | REVIEWER ASSESSMENT | REVIEWER COMMENTS                                                                                               |
|------------------------------------------------------------------|-----------------------------------------------------------------------------------------------------------------------------------------------------------------------------------------------------------------------------------------------------------------------------|---------------------|-----------------------------------------------------------------------------------------------------------------|
| Selection bias<br><b>Random Sequence Generation</b>              | A case-cohort within the EPIC-Potsdam study designed. Randomly selected individuals from all participants of the previous study, using appropriate statistics                                                                                                               | Low risk            | Did not stated which statistics, but said that the subsample was representative of the whole EPIC-Potsdam study |
| Selection bias<br><b>Allocation Concealment</b>                  | Doesn't apply                                                                                                                                                                                                                                                               | -                   | Since it was a prospective cohort, there was no need for allocation concealment                                 |
| Reporting Bias<br><b>Selective reporting</b>                     | Study protocol is available and all of the study's pre-specified (primary and secondary) outcomes (Physician diagnostic T2DM, RBC FA, FADS genotype, desaturase activity, dietary FA intake) that are of interest in the review have been reported in the pre-specified way | Low risk            |                                                                                                                 |
| Other bias<br><b>Other sources of bias</b>                       | None                                                                                                                                                                                                                                                                        | Low risk            |                                                                                                                 |
| Performance bias<br><b>Blinding (participants and personnel)</b> | Participants and personnel were not blinded, however the outcome doesn't seem to be affected by it since it is an observational study                                                                                                                                       | Low risk            |                                                                                                                 |
| Detection bias<br><b>Blinding (outcome assessment)</b>           | No blinding of outcome assessment, but the review authors judge that the outcome measurement is not likely to be influenced by lack of blinding                                                                                                                             | Low risk            |                                                                                                                 |
| Attrition bias<br><b>Incomplete outcome data</b>                 | No missing outcome data                                                                                                                                                                                                                                                     | Low risk            |                                                                                                                 |

**Article 3: Cormier et al, 2013**

| <b>DOMAIN</b>                                                    | <b>DESCRIPTION</b>                                                                                                                                                                                                                                     | <b>REVIEWER ASSESSMENT</b> | <b>REVIEWER COMMENTS</b>                                                                                         |
|------------------------------------------------------------------|--------------------------------------------------------------------------------------------------------------------------------------------------------------------------------------------------------------------------------------------------------|----------------------------|------------------------------------------------------------------------------------------------------------------|
| Selection bias<br><b>Random Sequence Generation</b>              | Individuals were recruited through advertisements and electronic messages                                                                                                                                                                              | Low risk                   |                                                                                                                  |
| Selection bias<br><b>Allocation Concealment</b>                  | All participants received supplementation.                                                                                                                                                                                                             | -                          | Since all participants received supplementation the investigators couldn't have biased the selection of subjects |
| Reporting Bias<br><b>Selective reporting</b>                     | Study protocol is available and all of the study's pre-specified (primary and secondary) outcomes (FG, FI, HOMA-IS – in response to n-3 supplementation, FADS genotype) that are of interest in the review have been reported in the pre-specified way | Low risk                   |                                                                                                                  |
| Other bias<br><b>Other sources of bias</b>                       | None                                                                                                                                                                                                                                                   | Low risk                   |                                                                                                                  |
| Performance bias<br><b>Blinding (participants and personnel)</b> | Participants and personnel were not blinded, however the outcome doesn't seem to be affected by it since all were supplemented. Individuals were also not aware of their genotype information.                                                         | Low risk                   |                                                                                                                  |
| Detection bias<br><b>Blinding (outcome assessment)</b>           | No blinding of outcome assessment, but the review authors judge that the outcome measurement is not likely to be influenced by lack of blinding                                                                                                        | Low risk                   |                                                                                                                  |
| Attrition bias<br><b>Incomplete outcome data</b>                 | No missing outcome data                                                                                                                                                                                                                                | Low risk                   |                                                                                                                  |

**Article 4: Yao et al, 2015**

| <b>DOMAIN</b>                                                    | <b>DESCRIPTION</b>                                                                                                                                                                                                                                     | <b>REVIEWER ASSESSMENT</b> | <b>REVIEWER COMMENTS</b>                                                                               |
|------------------------------------------------------------------|--------------------------------------------------------------------------------------------------------------------------------------------------------------------------------------------------------------------------------------------------------|----------------------------|--------------------------------------------------------------------------------------------------------|
| Selection bias<br><b>Random Sequence Generation</b>              | Individuals were recruited through a routine check-up in a Chinese Hospital. All subjects who met the eligibility criteria were recruited (for healthy case subjects or T2DM individuals)                                                              | Low risk                   |                                                                                                        |
| Selection bias<br><b>Allocation Concealment</b>                  | All participants had to answer the same questions                                                                                                                                                                                                      | -                          | Since all participants had to go under the same protocol, a biased selection of subjects is improbable |
| Reporting Bias<br><b>Selective reporting</b>                     | Study protocol is available and all of the study's pre-specified (primary and secondary) outcomes (FG, FI, HOMA-IS – in response to n-3 supplementation, FADS genotype) that are of interest in the review have been reported in the pre-specified way | Low risk                   |                                                                                                        |
| Other bias<br><b>Other sources of bias</b>                       | None                                                                                                                                                                                                                                                   | Low risk                   |                                                                                                        |
| Performance bias<br><b>Blinding (participants and personnel)</b> | Participants and personnel were not blinded, however the outcome doesn't seem to be affected by it since they weren't receiving an intervention                                                                                                        | Low risk                   |                                                                                                        |
| Detection bias<br><b>Blinding (outcome assessment)</b>           | No blinding of outcome assessment, but the review authors judge that the outcome measurement is not likely to be influenced by lack of blinding                                                                                                        | Low risk                   |                                                                                                        |
| Attrition bias<br><b>Incomplete outcome data</b>                 | No missing outcome data                                                                                                                                                                                                                                | Low risk                   |                                                                                                        |

**Article 5: Takkunen et al, 2016**

| <b>DOMAIN</b>                                                    | <b>DESCRIPTION</b>                                                                                                                                                                                                                                                                    | <b>REVIEWER ASSESSMENT</b> | <b>REVIEWER COMMENTS</b> |
|------------------------------------------------------------------|---------------------------------------------------------------------------------------------------------------------------------------------------------------------------------------------------------------------------------------------------------------------------------------|----------------------------|--------------------------|
| Selection bias<br><b>Random Sequence Generation</b>              | Individuals who were at high risk for T2DM were recruited (from advertisement, epidemiological surveys, population screening) and randomized into a control or intensive lifestyle intervention group                                                                                 | Low risk                   |                          |
| Selection bias<br><b>Allocation Concealment</b>                  | Not enough information:<br>- Did the people in each group know they were in case or control group? Or did they think they were all receiving the same information?                                                                                                                    | Unclear risk               |                          |
| Reporting Bias<br><b>Selective reporting</b>                     | Study protocol is available and all of the study's pre-specified (primary and secondary) outcomes (Serum FA composition, T2DM incidence, Insulin Secretion, Insulin sensitivity and disposition index) that are of interest in the review have been reported in the pre-specified way | Low risk                   |                          |
| Other bias<br><b>Other sources of bias</b>                       | None                                                                                                                                                                                                                                                                                  | Low risk                   |                          |
| Performance bias<br><b>Blinding (participants and personnel)</b> | Not enough information:<br>- Were the individuals aware that they were receiving different intervention?                                                                                                                                                                              | Unclear risk               |                          |
| Detection bias<br><b>Blinding (outcome assessment)</b>           | No information regarding blinding of outcome assessment                                                                                                                                                                                                                               | Unclear risk               |                          |
| Attrition bias<br><b>Incomplete outcome data</b>                 | No missing outcome data                                                                                                                                                                                                                                                               | Low risk                   |                          |
